# Supplementary material for: Thermodynamics of strain-induced crystallization of random copolymers
Source: Royal Society of Chemistry journal article supplement (doi:10.1039/c3sm52465e), 2013-10-31
Supplement: c3sm52465e.pdf [file c3sm52465e.pdf]

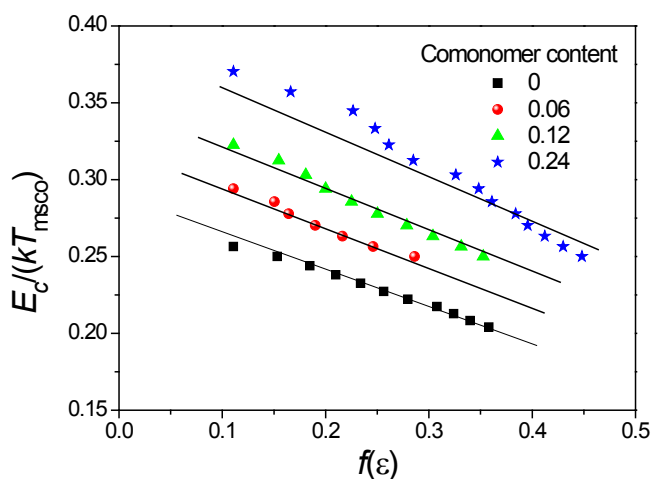

**Figure S1** Inverse melting points versus the strain function in Eqn. (3) obtained from the onset strains at various temperatures for homopolymers and copolymers with the labeled comonomer contents. The parallel straight lines are drawn to guide the eyes.

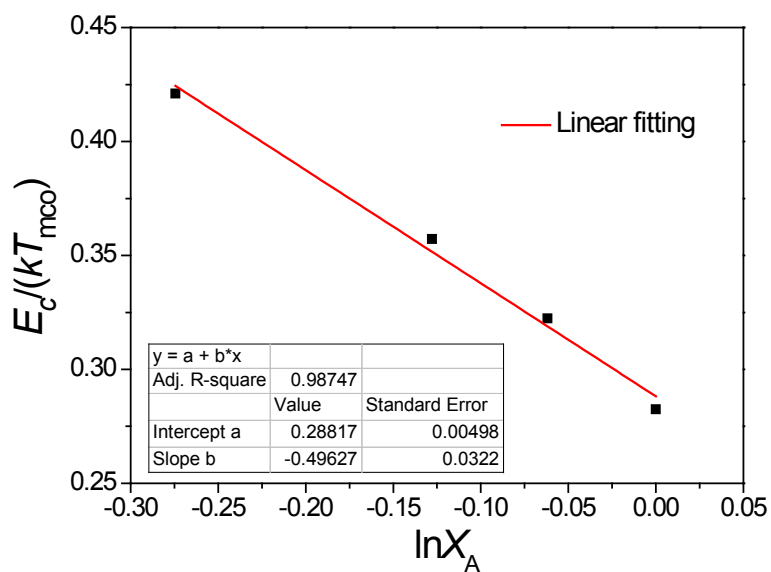

**Figure S2** Inverse melting points versus logarithmic monomer volume fractions for various copolymers in Eqn. (1). The melting points were obtained from the intercepts of linear extrapolation of the curves observed in Fig. S1. The straight line results from linear regression with the fitting parameters shown in the inset table.
